# Supplementary material for: STIM1 is a core trigger of airway smooth muscle remodeling and hyperresponsiveness in asthma
Source: PubMed Central journal article supplement — Proc Natl Acad Sci U S A. 2021 Dec 23;119(1):e2114557118. doi: 10.1073/pnas.2114557118 (PMC8740694; doi:10.1073/pnas.2114557118), 2021-12-23
Supplement: pnas.2114557118.sd02.pdf [file pnas.2114557118.sd02.pdf]

1a

Myh11 Cre  
STIM1<sup>fl/fl</sup>  
STIM1 smKO

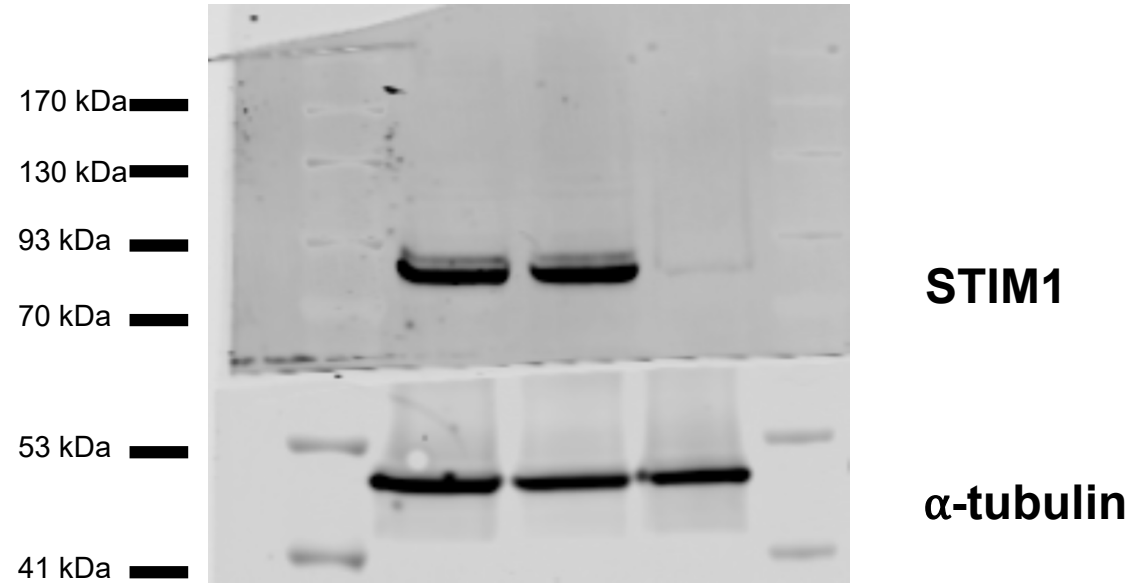

2a

100 kDa

75 kDa

50 kDa

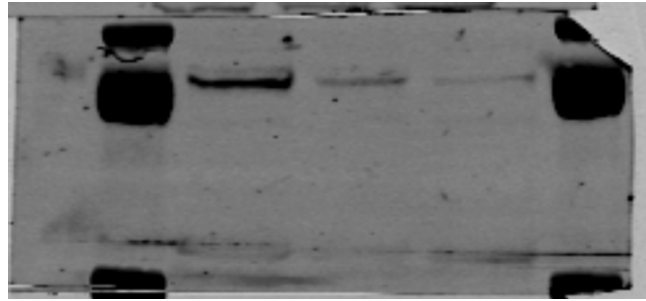

shScramble  
shSTIM1 #1  
shSTIM1 #5

STIM1

shScramble  
shSTIM1 #1  
shSTIM1 #5

75 kDa

37 kDa

25 kDa

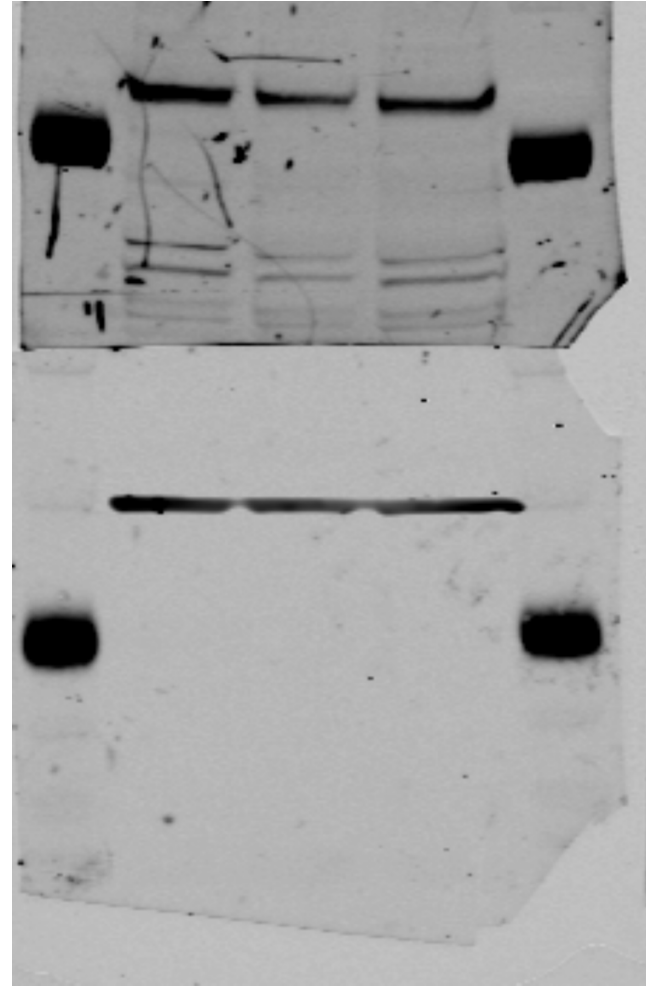

STIM2

GAPDH

4a

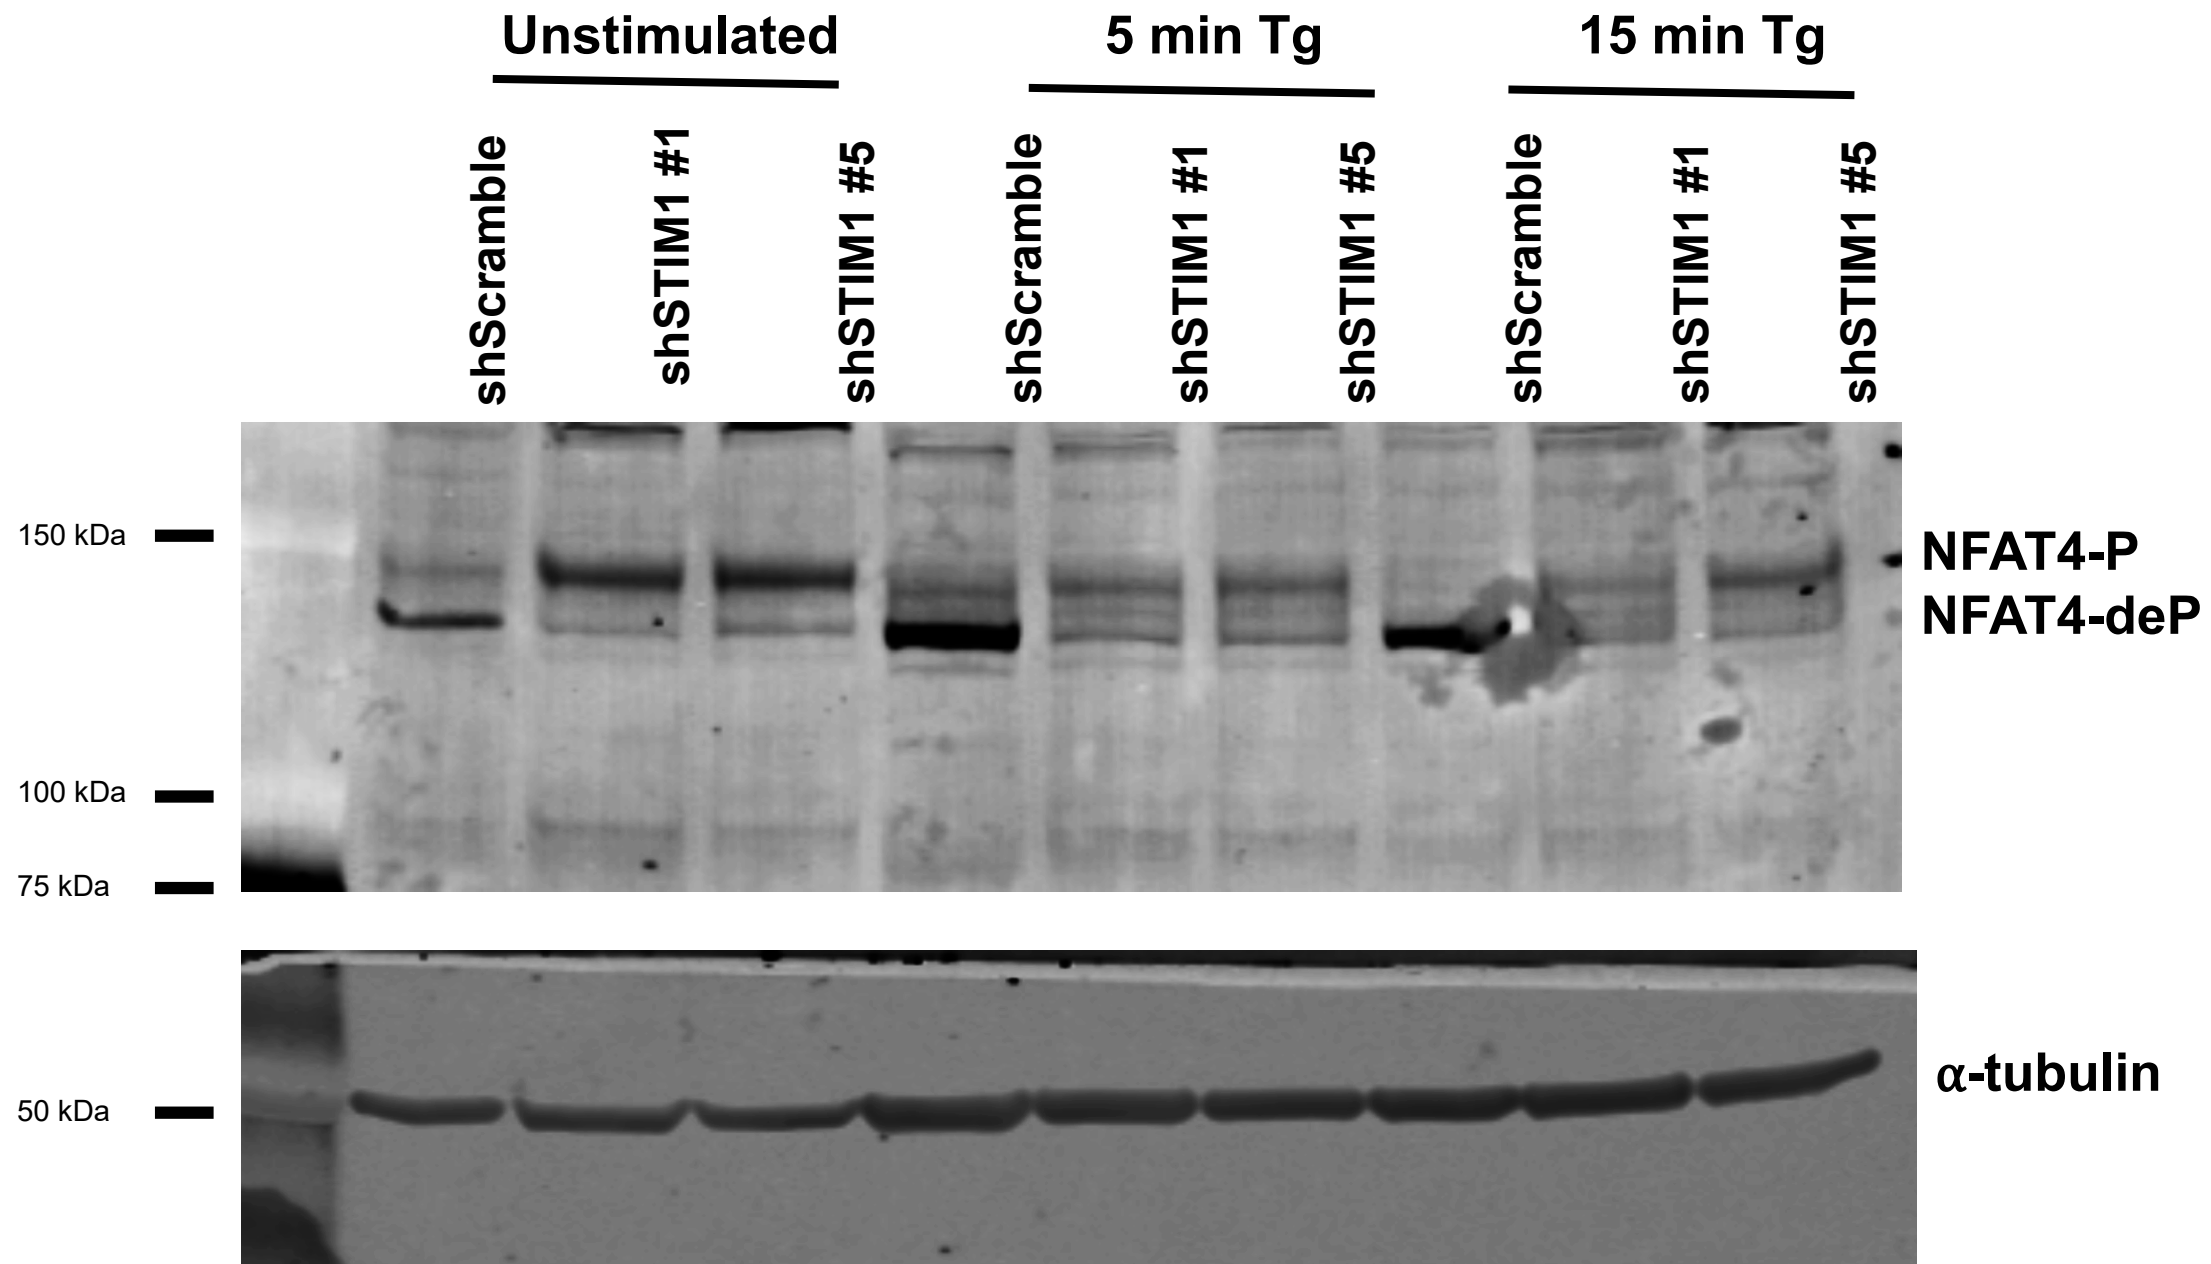

5g

shScramble  
shSTIM1 #1  
shSTIM1 #5

100 kDa

75 kDa

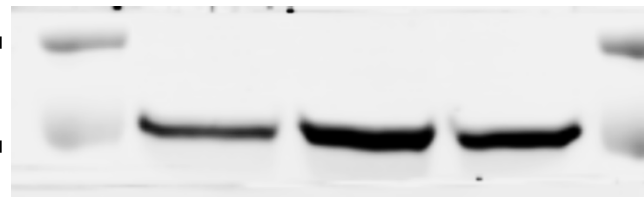

**MFN2**

50 kDa

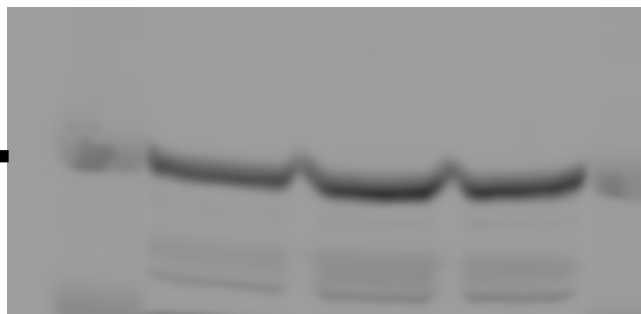

**α-tubulin**

170 kDa

130 kDa

93 kDa

70 kDa

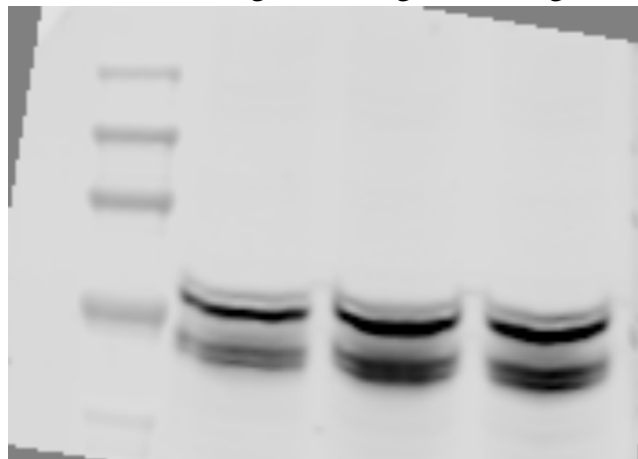

**OPA1L  
OPA1S**

41 kDa

30 kDa

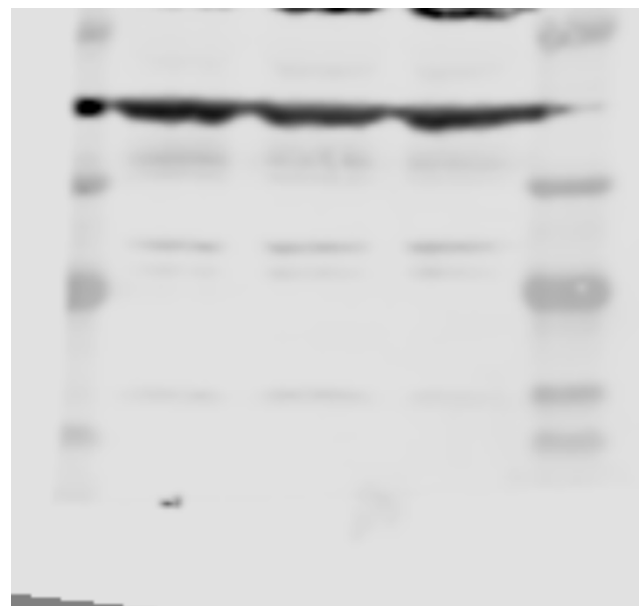

**GAPDH**

5n

shScramble  
shSTIM1 #1  
shSTIM1 #5

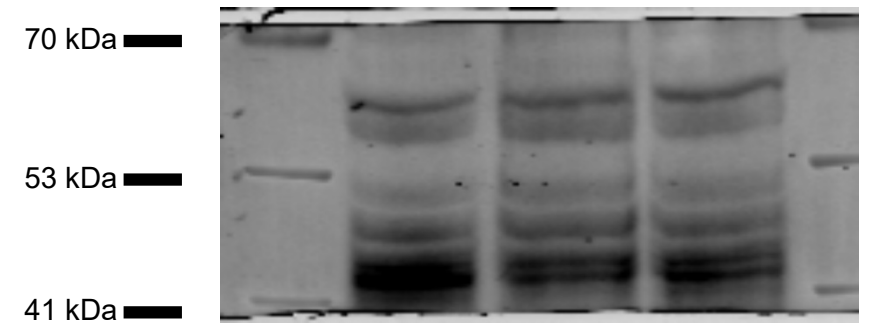

**GLUT1**

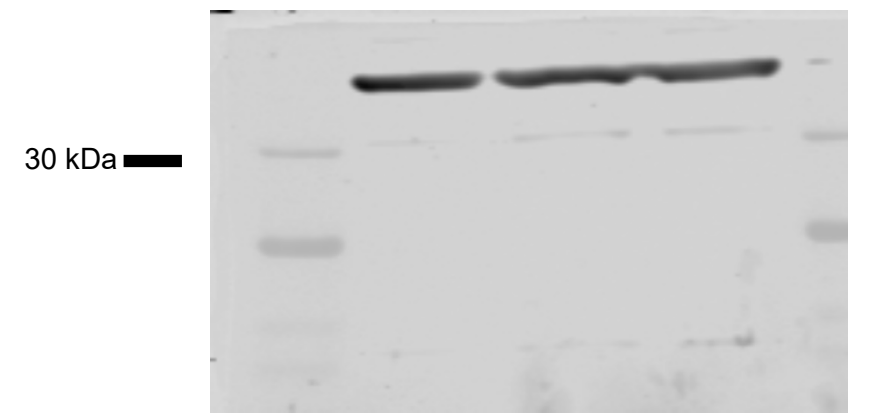

**GAPDH**

**s1c**

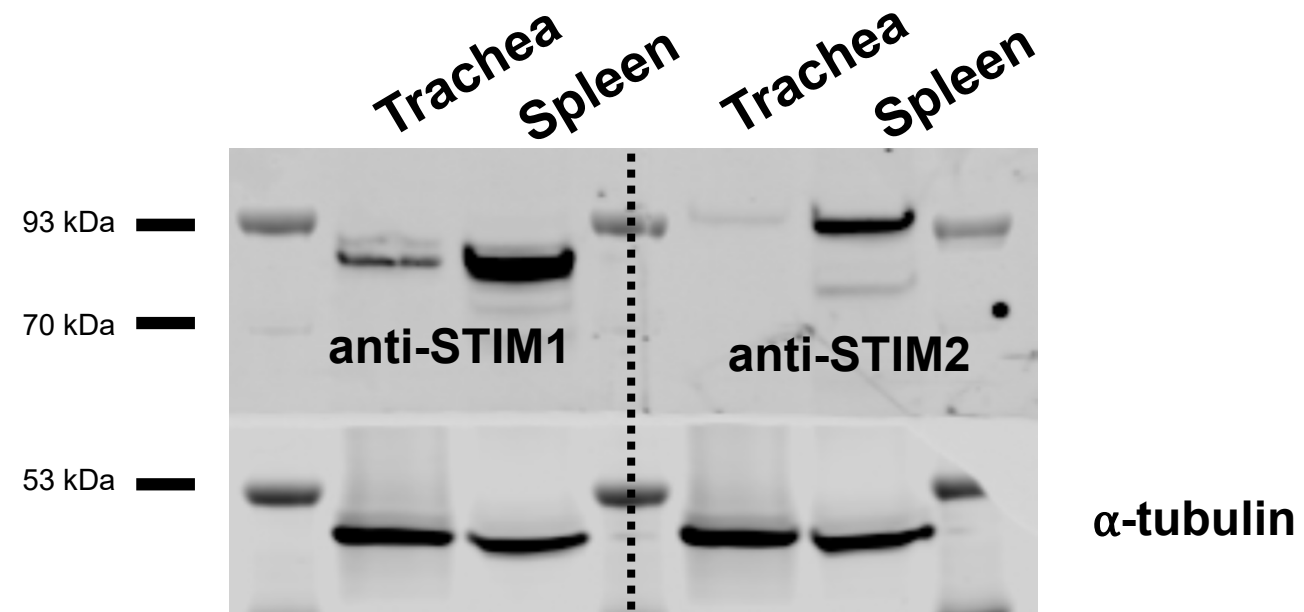

s2b

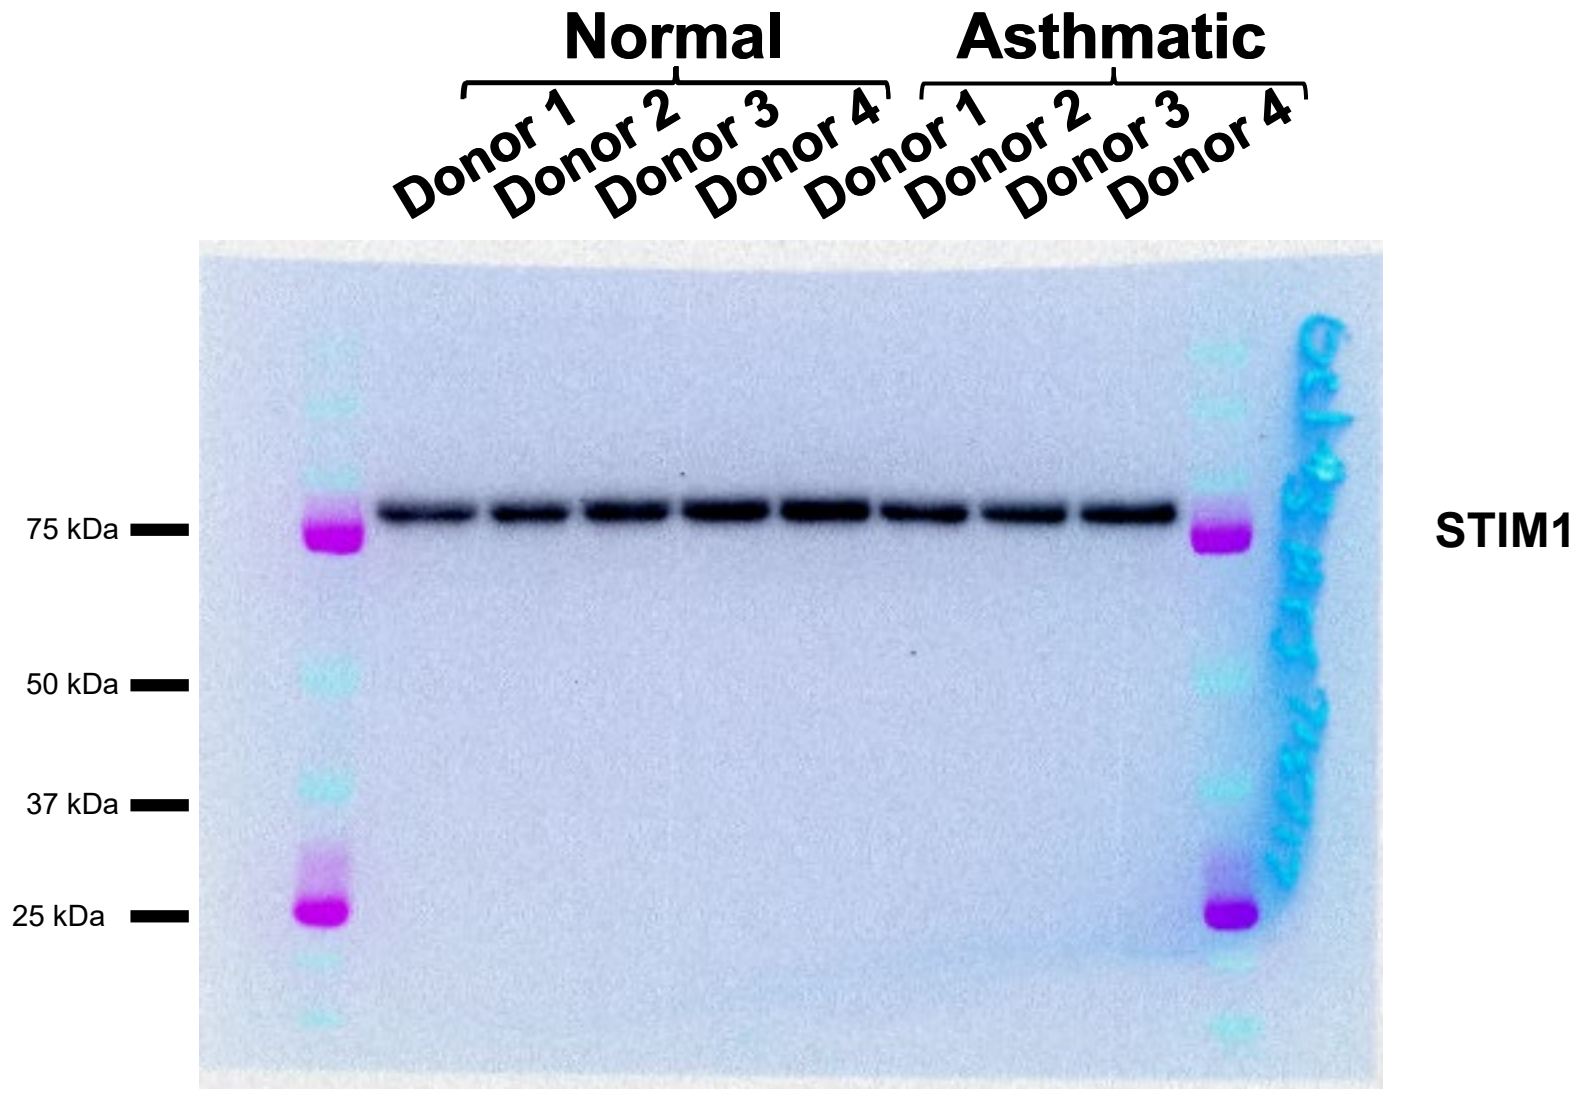

s2b

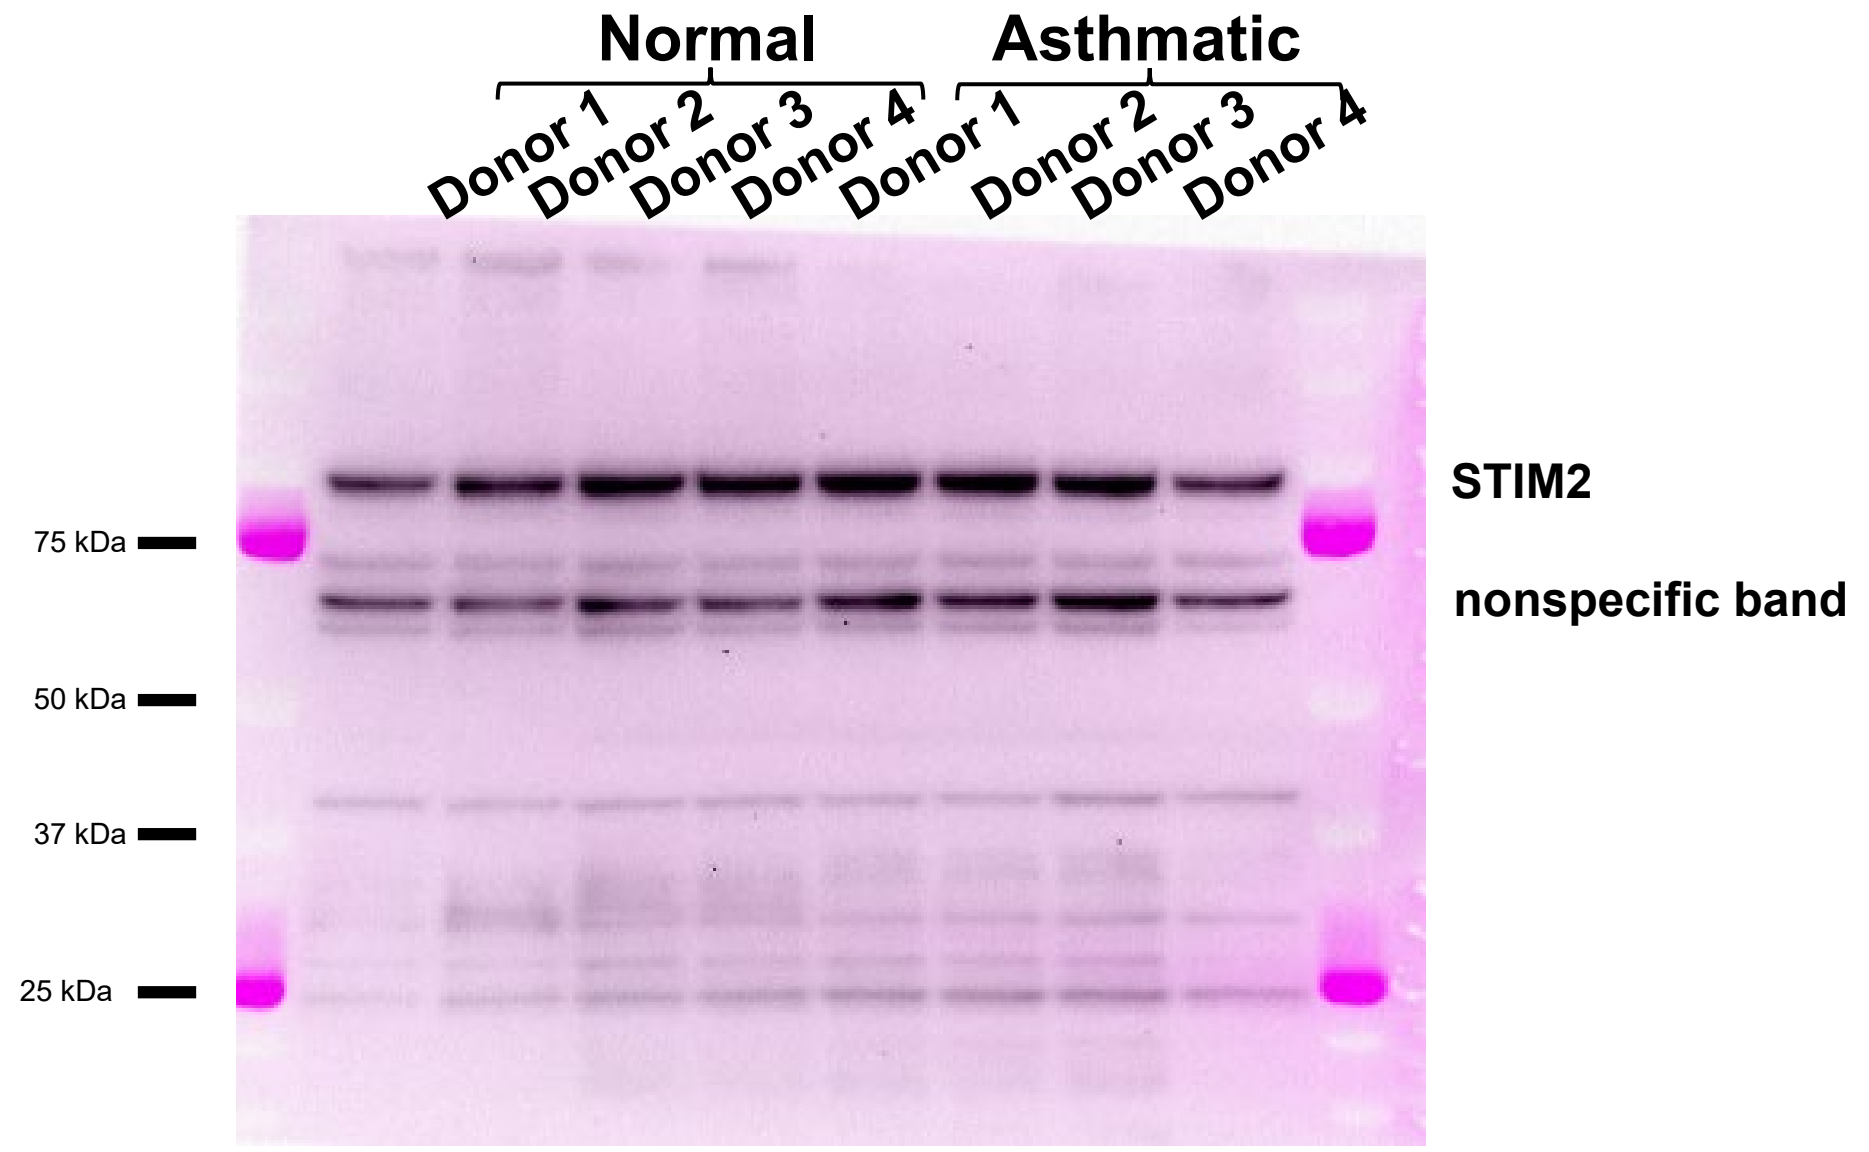



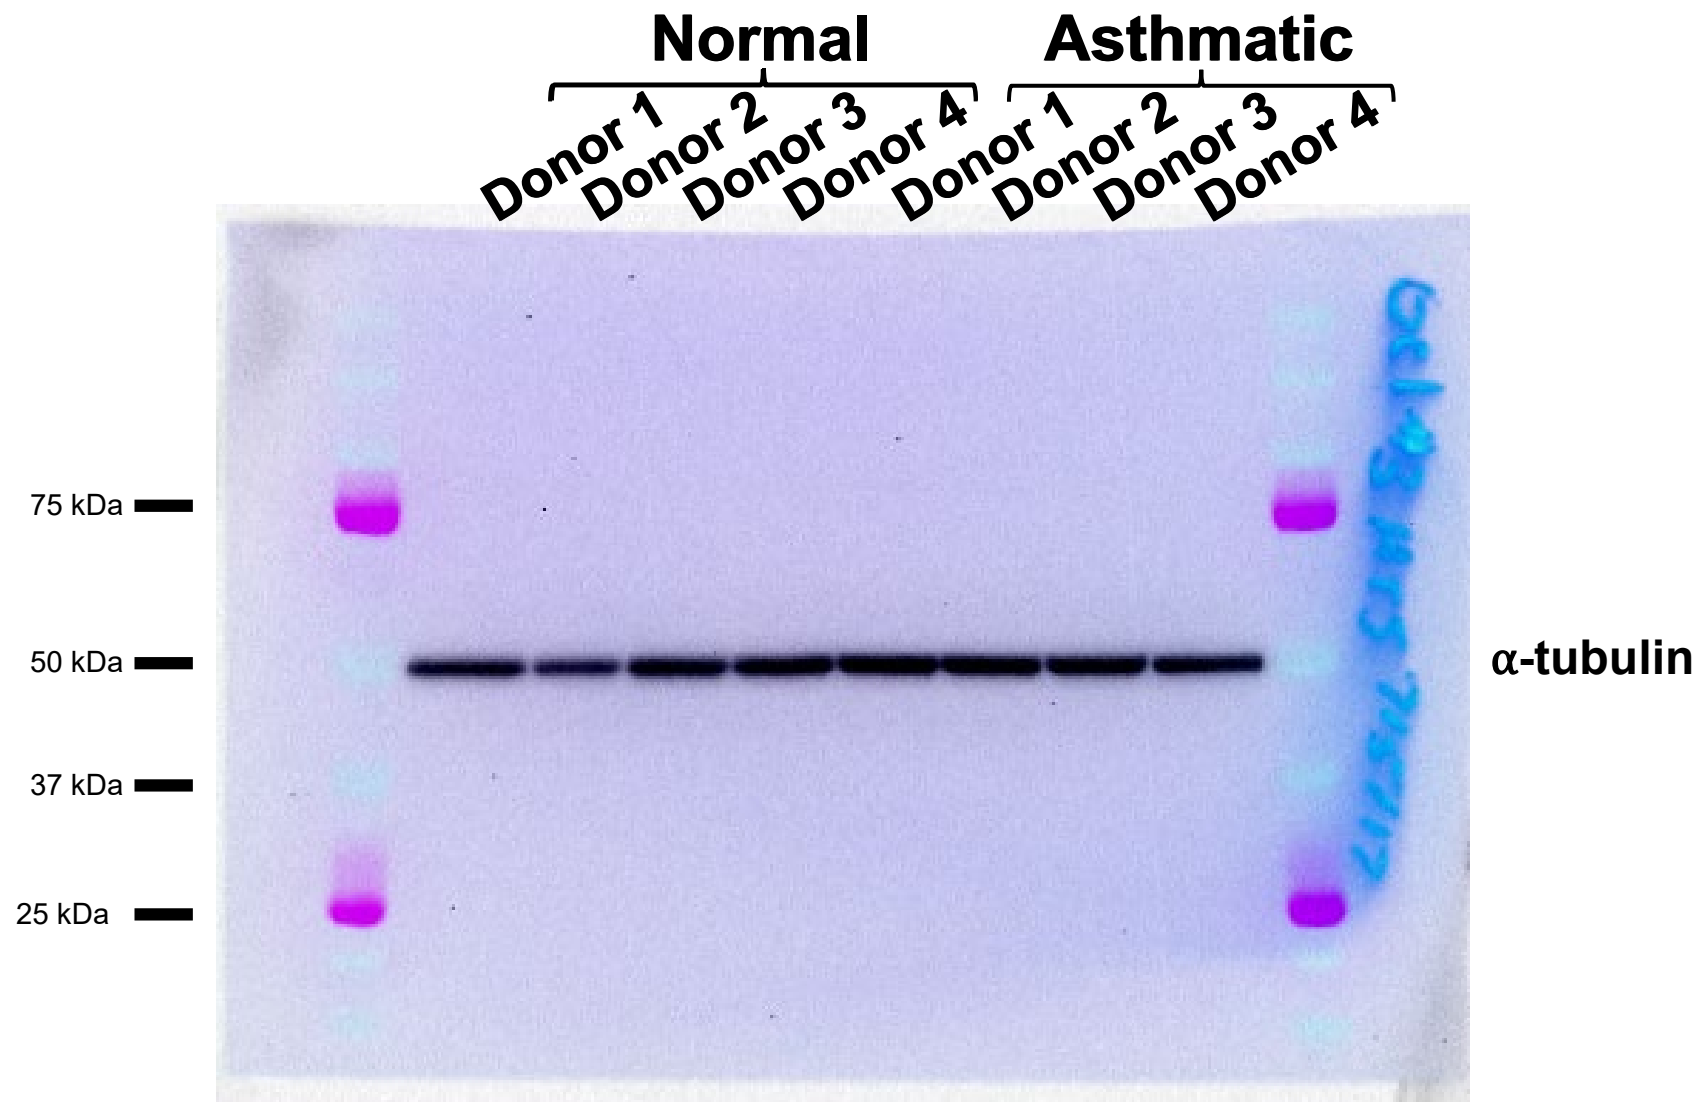

**s3a**

**shScramble**  
**shSTIM1 #1**  
**shSTIM1 #5**

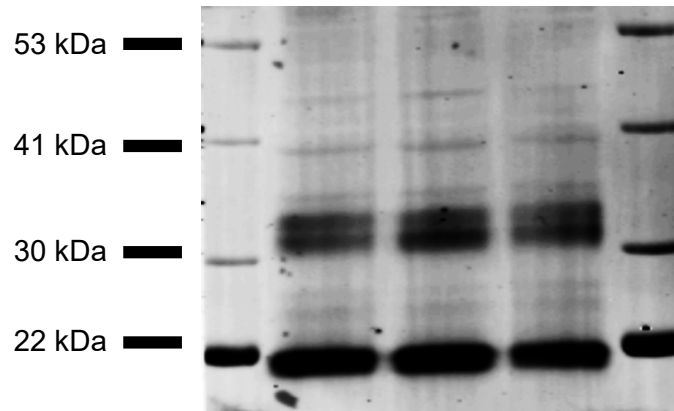

**ORAI1 $\alpha$**

**ORAI1 $\beta$**

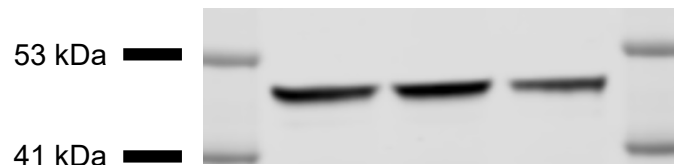

**$\alpha$ -tubulin**

**s3f**

**shScramble**  
**shSTIM1 #1**  
**shSTIM1 #5**

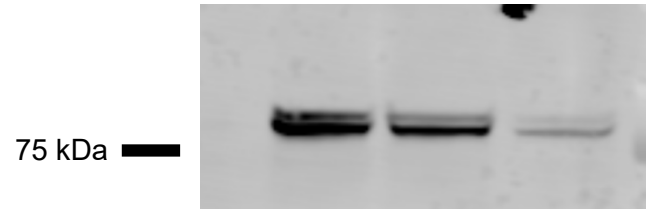

**STIM1**

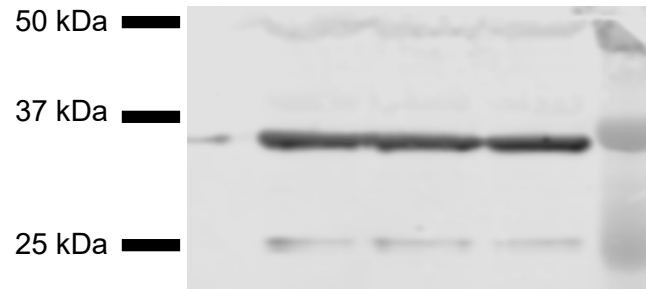

**GAPDH**

s4c

shScramble  
shSTIM1 #1  
shSTIM1 #5

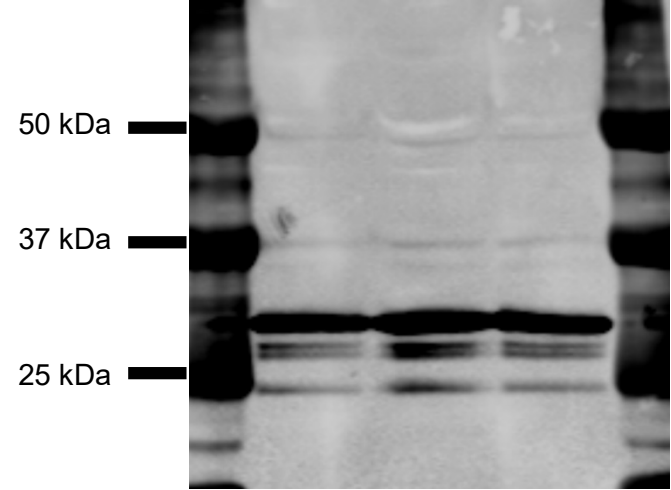

Caspase 3  
Cleaved Caspase 3

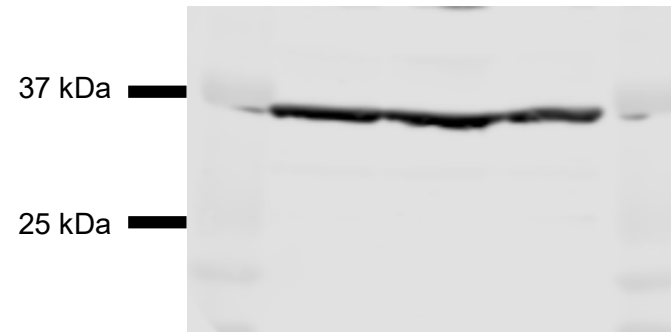

GAPDH

s5g

+ 2  $\mu$ M Tg

0'

5'

15'

30'

30'

30'

+ 5  $\mu$ M Gd<sup>3+</sup>  
+ 1  $\mu$ M CsA

150 kDa

100 kDa

75 kDa

NFAT4-P  
NFAT4-deP

75 kDa

50 kDa

37 kDa

$\alpha$ -tubulin

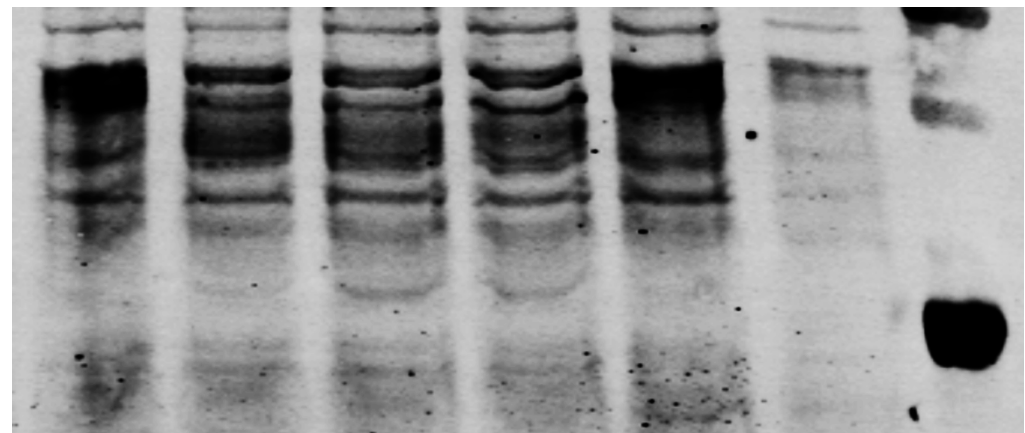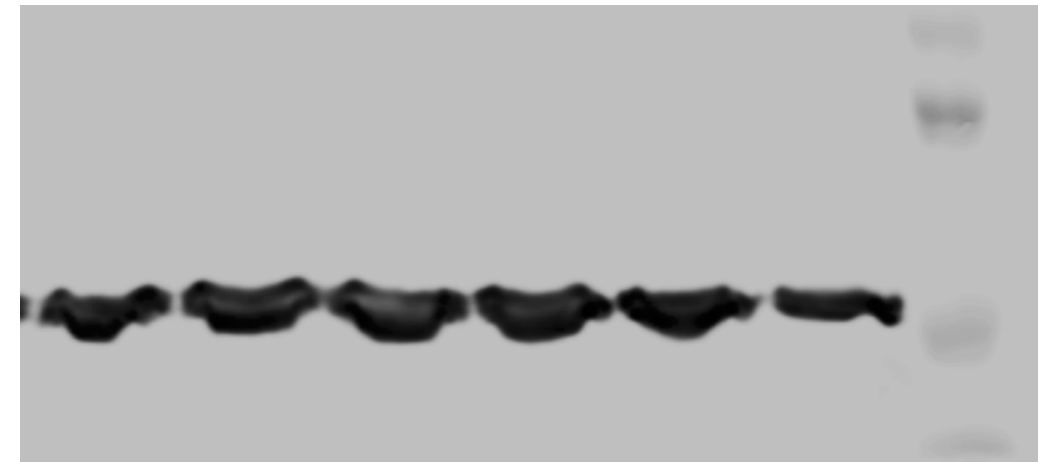

**s8f**

shScramble  
shSTIM1 #1  
shSTIM1 #5

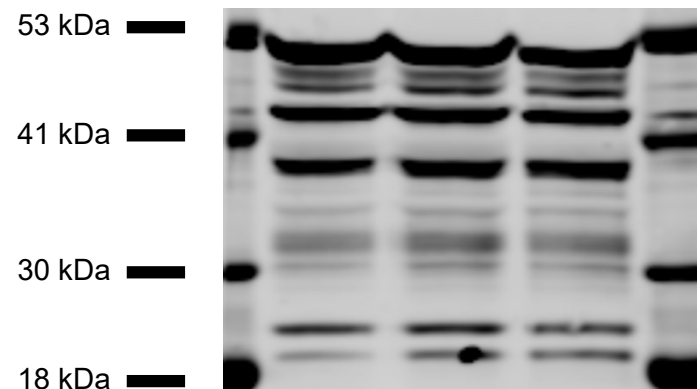

Complex V (ATP5A)  
Complex III (UQCRC2)  
Complex IV (MTCO1)  
Complex II (SDHB)  
Complex I (NDUFB8)

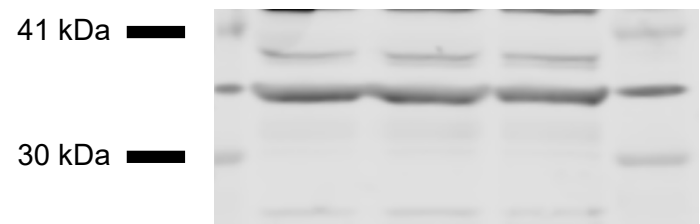

**GAPDH**

**s8h**

shScramble  
shSTIM1 #1  
shSTIM1 #5

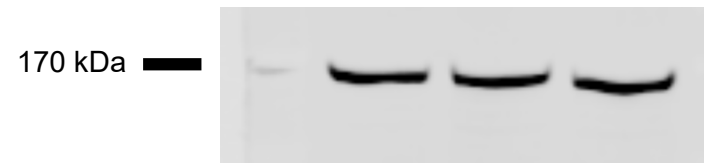

**PGC1α**

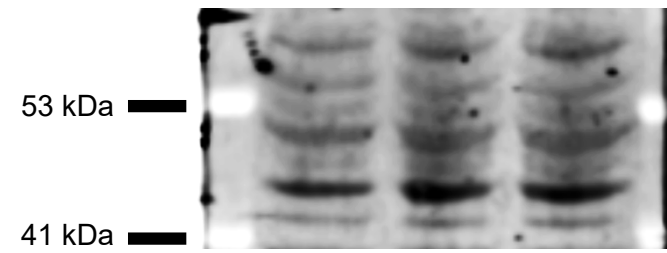

**PPR<sub>γ</sub>2**  
**PPR<sub>γ</sub>1**

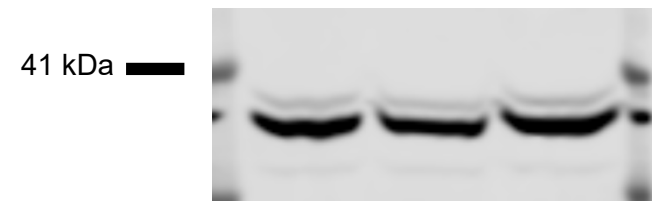

**GAPDH**
